# Supplementary material
Source: publisher figshare collection journal article supplement (https://gsajournals.figshare.com/ndownloader/files/17502341)
Supplement: Supplementary file 1 [file 17502341]

## Sheet: Table S6
TABLE S6 | Independent assortment of Cf-Ecp5.12p and Cf-Ecp5.12l with Ecp5-dependent HR suppression in Ont7522 and LA2852 background. Segregation ratios of 39 wild-type plants from two Ont7522 x (Cf0 x LA2852) selfed populations (B582 and B583). Haplotype composition is shown for chromosome 12 markers C2_At4g26180 and cLET-8-4K, which are linked to both Cf-Ecp5.12p and Cf-Ecp5.12l genes at AN loc…
	C2_At4g26180		cLET-8-K4
Haplotype	B582	B583	B582	B583
OO	4	3	4	3
OL	14	5	14	5
LL	10	3	10	3
p-value(χ2)	0.509	0.978	0.509	0.978
